# Supplementary material for: Atom interaction propensities of oxygenated chemical functions in crystal packings
Source: PubMed Central journal article supplement (PMC5330527; doi:10.1107/s2052252516020200), 2017-01-21
Supplement: m-04-00158-sup1.pdf [file m-04-00158-sup1.pdf]

# IUCrJ

**Volume 4 (2017)**

**Supporting information for article:**

**Atom interaction propensities of oxygenated chemical functions in crystal packings**

**Christian Jelsch and Yvon Bibila Mayaya Bisseyou**

# Supplementary Materials.

## Atom interaction propensities of oxygenated chemical functions in crystal packings.

IUCr J.

Christian Jelsch<sup>a</sup> & Yvon Bibila Mayaya Bisseyou<sup>b</sup>.

<sup>a</sup>CRM2, CNRS, Institut Jean Barriol, Université de Lorraine, Vandoeuvre les Nancy cedex, France,

<sup>b</sup> Laboratoire de Cristallographie et Physique Moléculaire, UFR SSMT, Université Félix Houphouët-Boigny, 22 BP 582 Abidjan 22, Côte d'Ivoire.

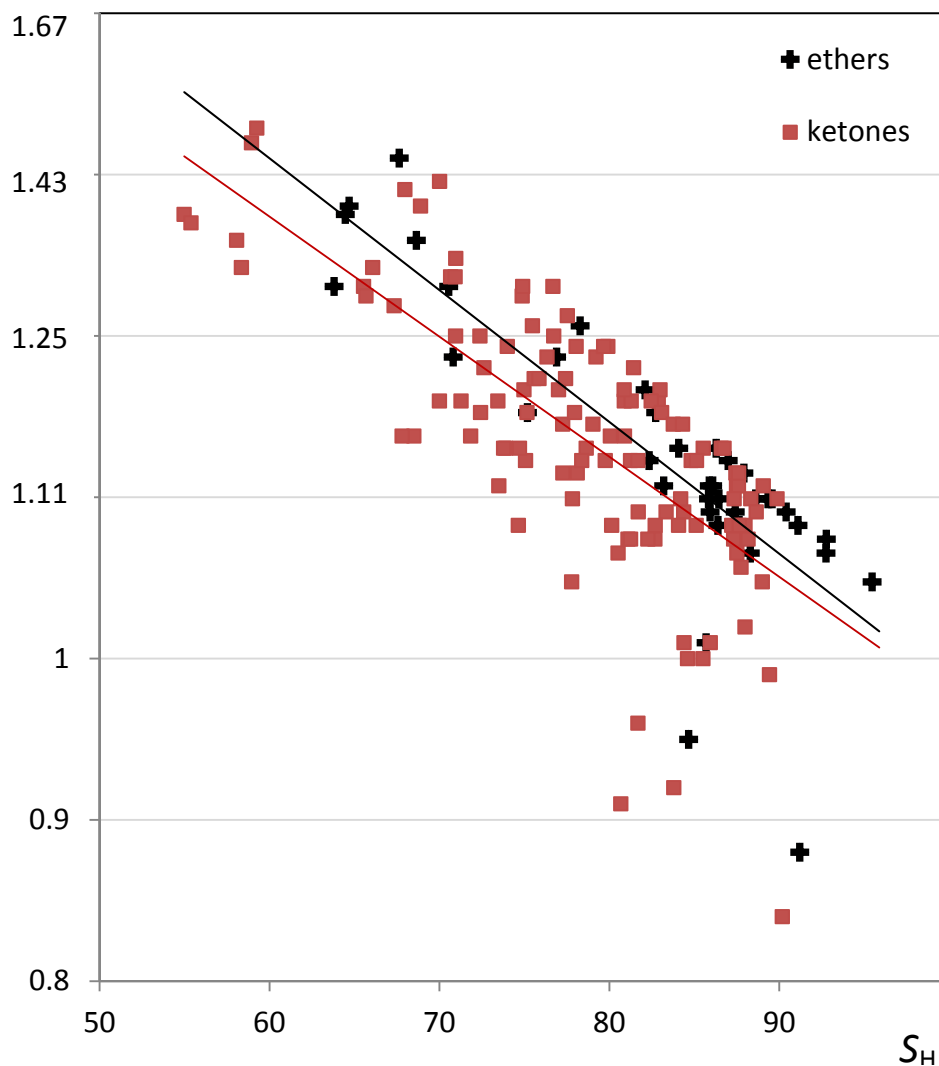

**Figure SUP1.** Comparison of enrichment ratios  $E_{OH}$  for ketones and ethers as a function of hydrogen content on the surface.

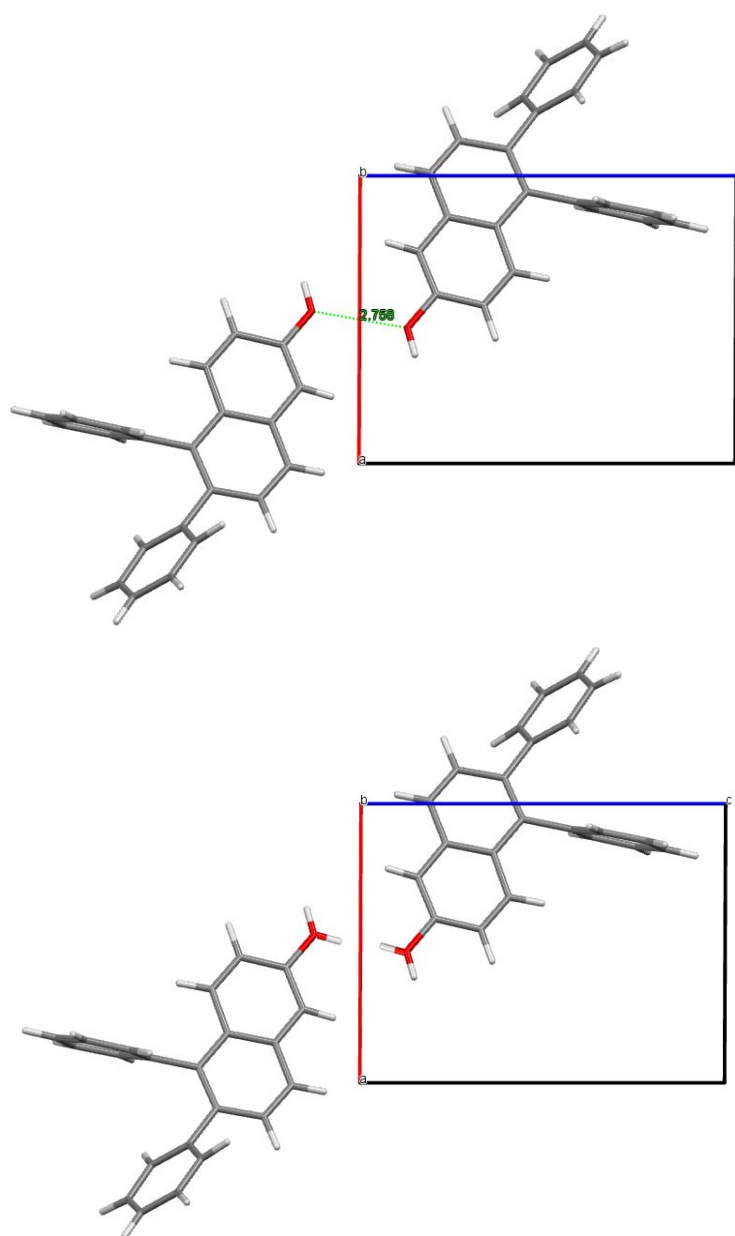

**Figure Sup2**

View of a dimer of KAZHAU molecule, which is an outlier among phenols with a large  $E(O,O) = 11.8$  enrichment ratio. The middle of the O...O short interaction is an inversion center. Top view: the published structure. Bottom view: proposed correct structure with a disordered hydroxyl hydrogen atom forming a O-Ho...O hydrogen bond (occupancies  $\frac{1}{2}$ ). Reference: Stanciu, C., Olmstead, M. M., Phillips, A.D., Stender, M. & Power, P. P., (2003), *Eur. J. Inorg. Chem.*, 3495-3500.

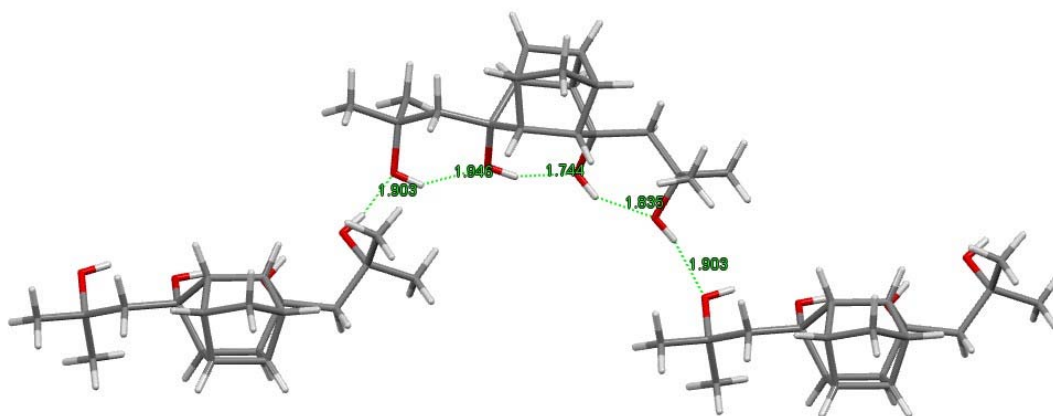

**Figure SUP3**

Example of an alcohol with an only moderately enriched O...Ho contacts which appears as an outlier in the  $[S_o, E(O,HO)]$  scatterplot at position  $S_o=7.6$  and  $E(O,HO)=2.25$ . The molecule is peculiar at it has three intramolecular H-bonds.

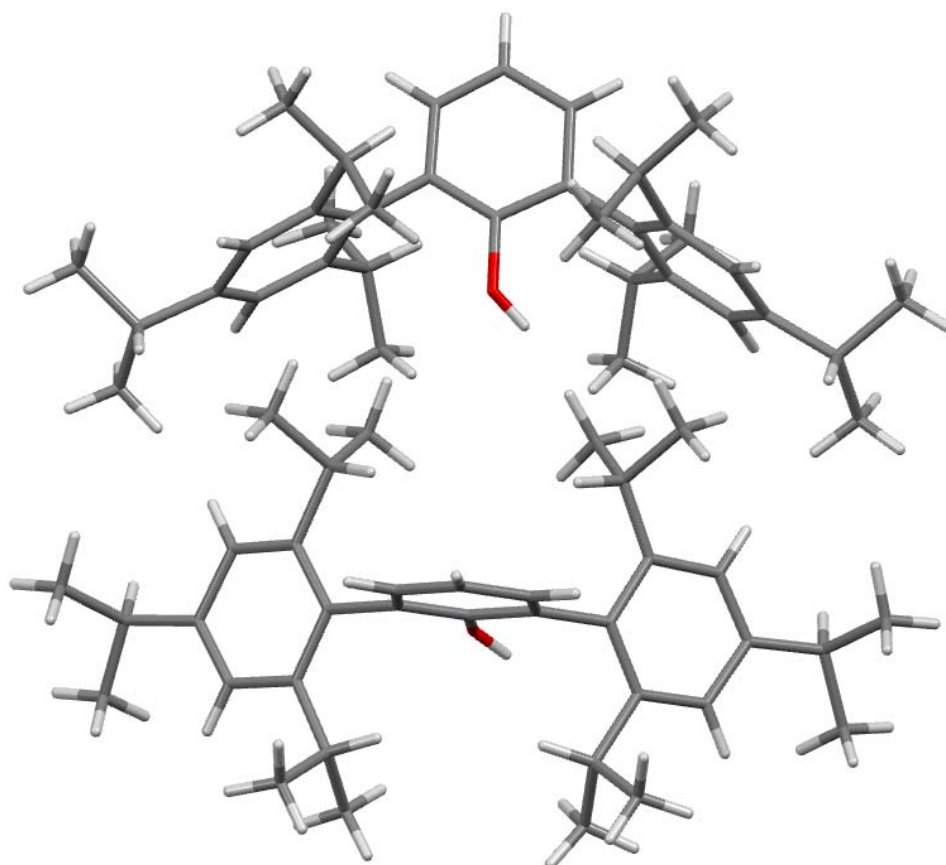

**Figure Sup4.**

Example of an outlier phenol molecule (refcode AKUSEE) without intermolecular O-H...O hydrogen bond due to the bulky environment around the hydroxyl group (view of a dimer).

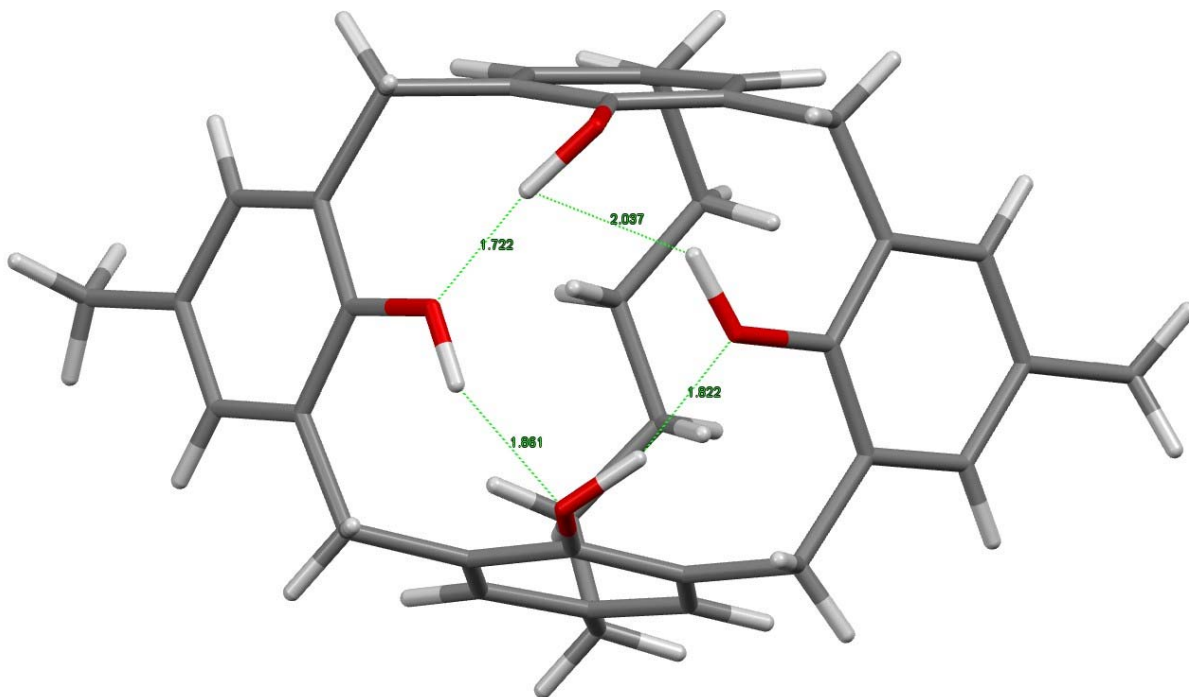

**Figure Sup5.**

Example of an outlier phenol molecule (refcode JABVUD) without intermolecular O-H...O hydrogen bond but with intramolecular H-bonds.

**Figure Sup6.**

Example of an outlier phenol molecule (refcode TUJYAZ) without intermolecular O-H...O hydrogen bond but with intramolecular C-H... $\pi$  hydrogen bonds

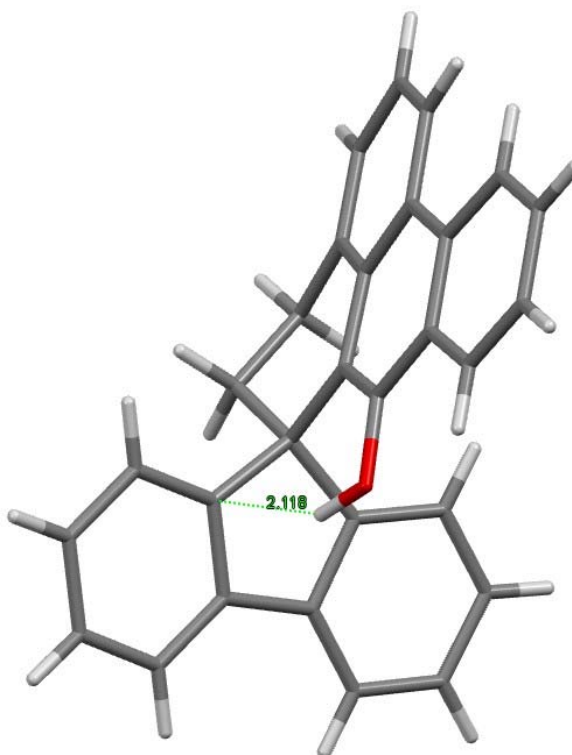

**Figure Sup7.**

Repartition of Hirshfeld surface content as function of  $S_O$  oxygen content in phenols.

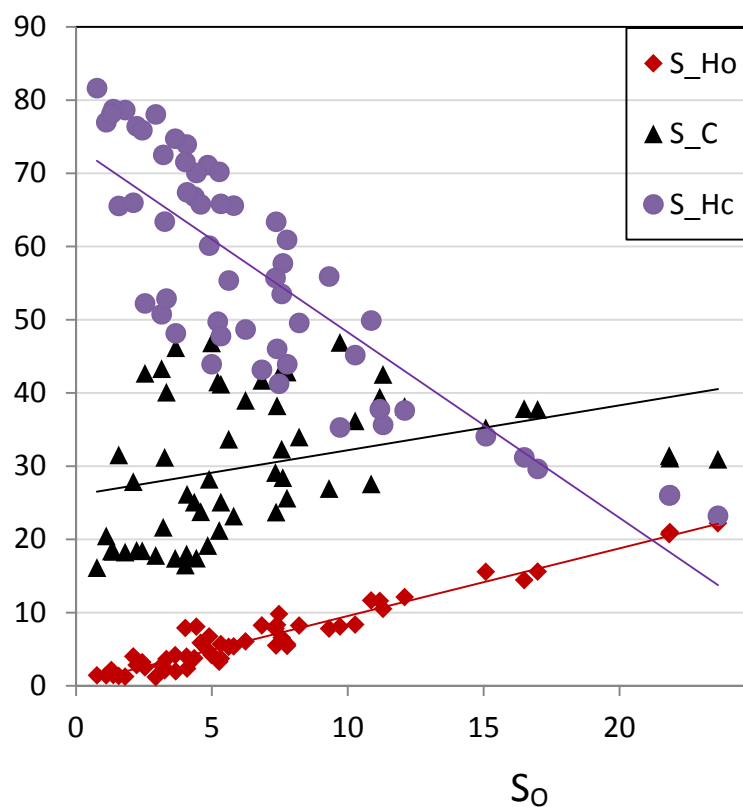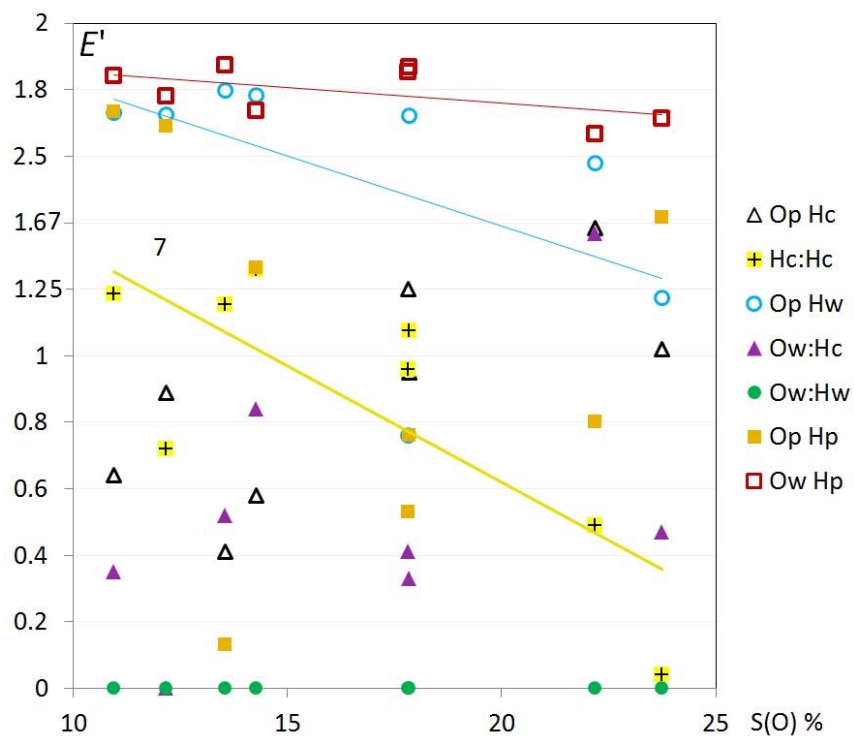

**Figure Sup 8.** Enrichment of the oxygen...hydrogen contacts in crystals of phenol-monohydrates as a function of total oxygen content on the molecular surface. "p" and "w" suffixes refer to phenol and water, respectively. The  $E$  ratios of the Hc...Hc hydrophobic interactions are also displayed.

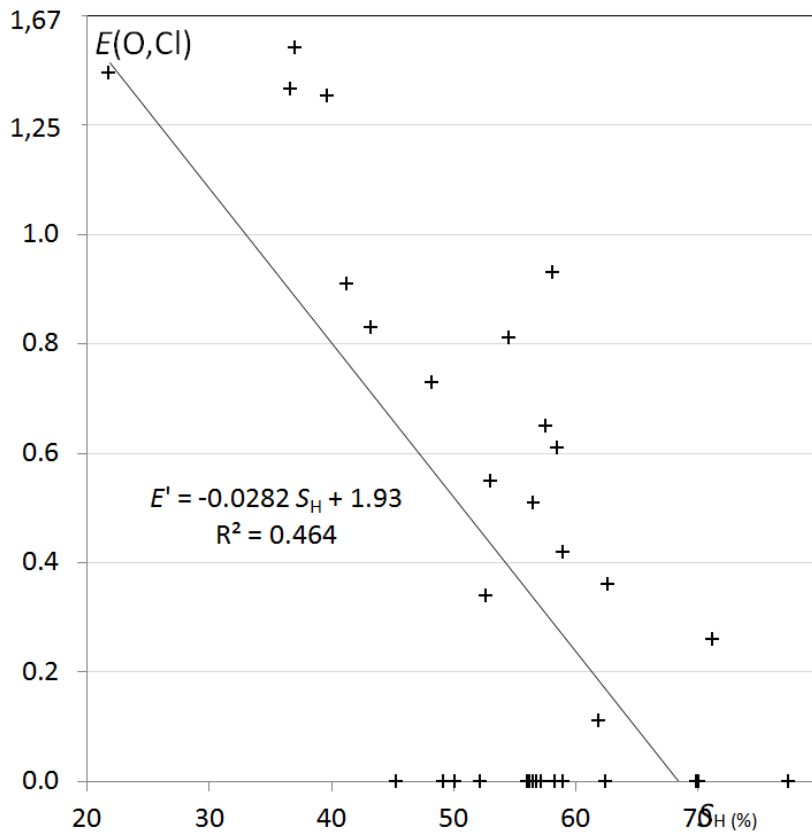

**Fig. Sup9.** Enrichment  $E(O,Cl)$  in chloro-ethers as a function of  $S_H$ .

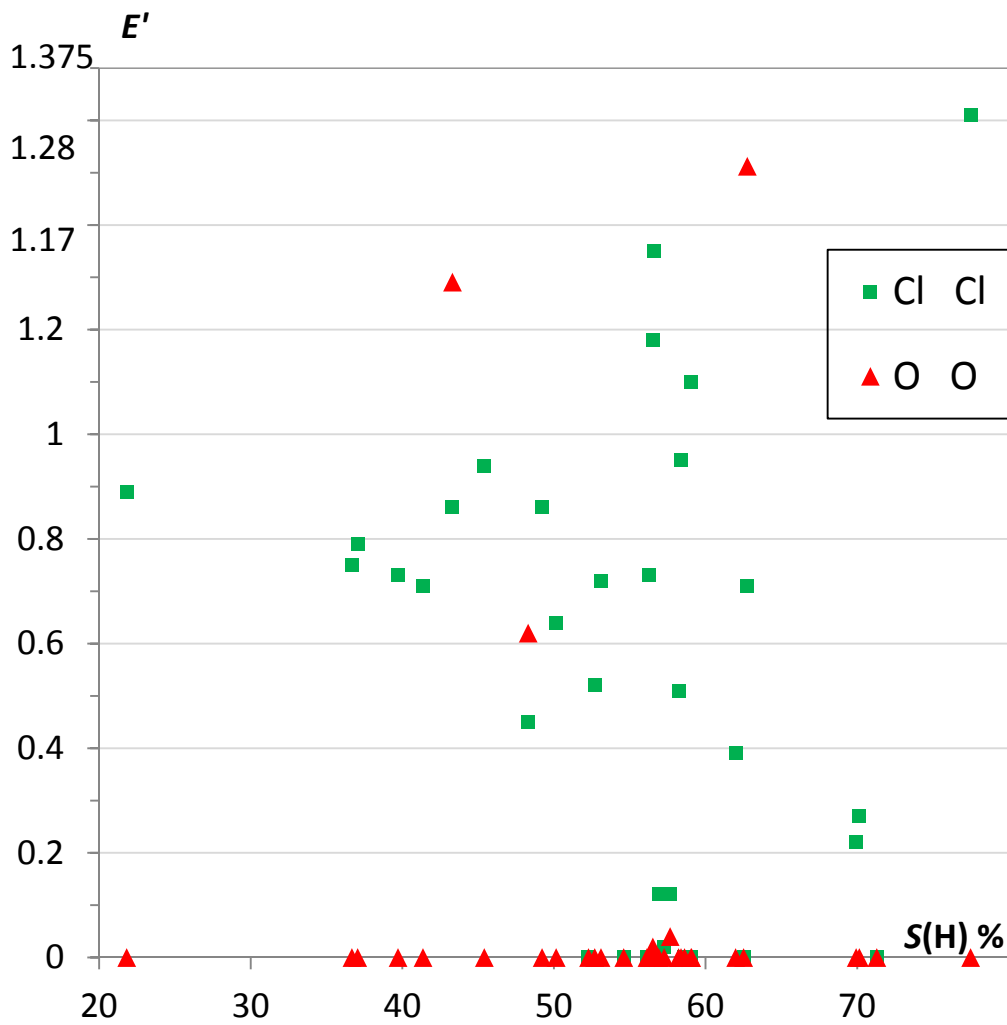

**Figure Sup10.** Enrichment ratios between chlorine and oxygen atoms in chloro hydrocarbons containing an ether group.



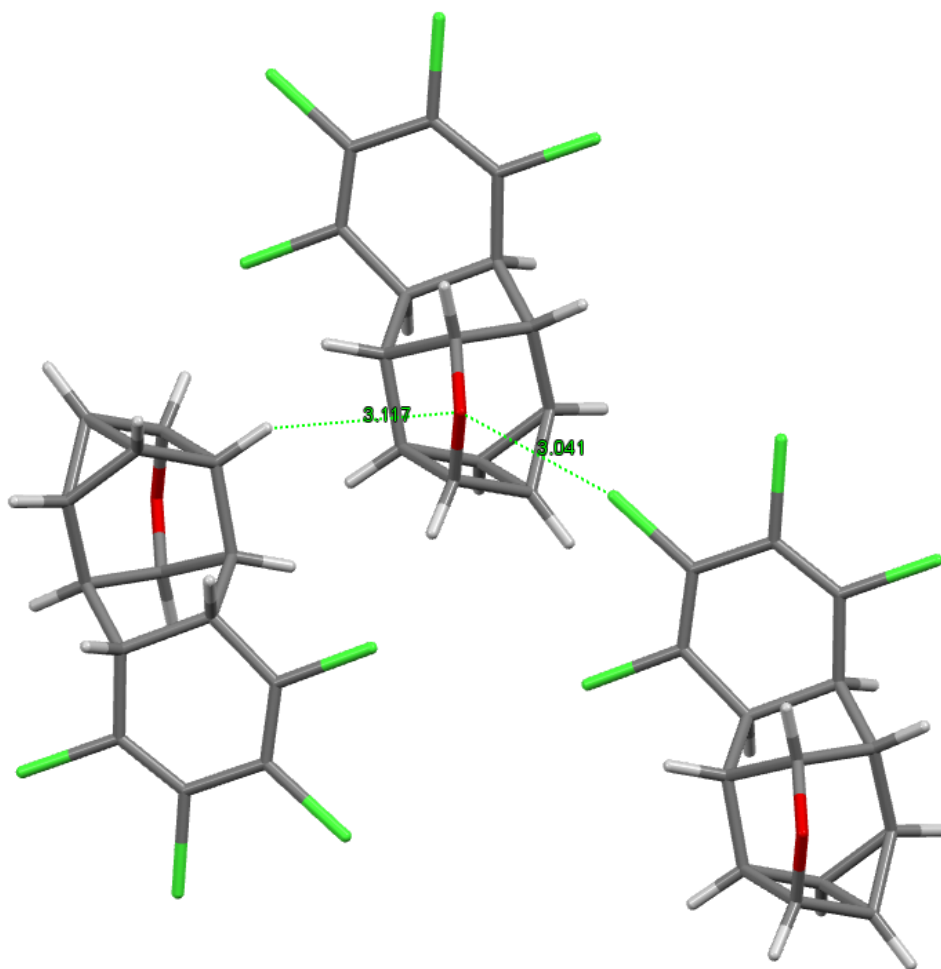

**Figure Sup11** Example of a chloro-ether compound with high  $E(O,Cl)= 1.34$  . The unique ether oxygen atoms forms a  $O\dots Cl$  halogen bond and a  $C-H\dots O$  weak hydrogen bond. The angle  $C-Cl\dots O$  is  $158.2^\circ$ . Compound refcode FUDBAI: Etzkorn, M., Amado-Sierra, M. del R. I., Smeltz, S. D., Gerken, M. (2009), *Tetrahedron Lett.* 50, 2991-2993.

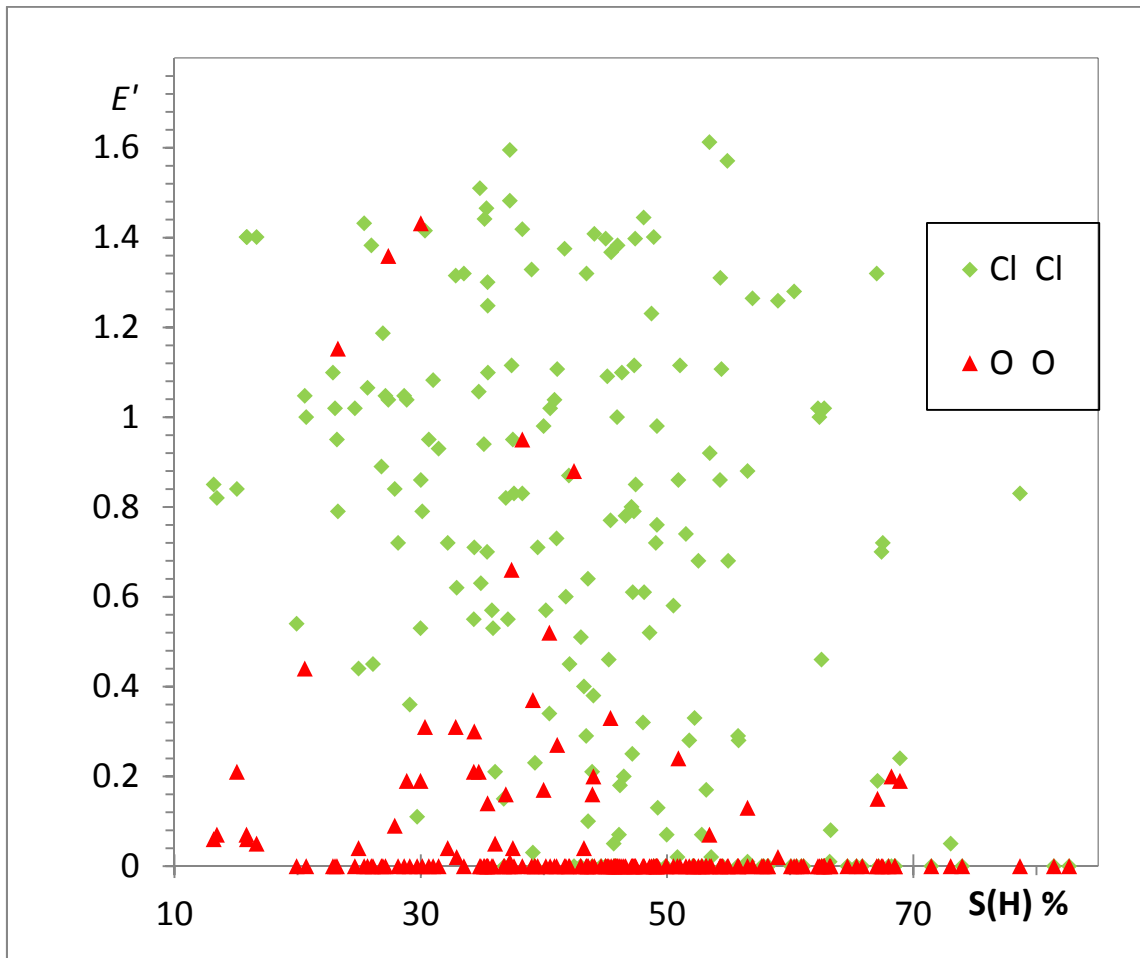

**Figure Sup12.**

Enrichment ratios between of chlorine...chlorine and of oxygen...oxygen contacts in chlorinated ketones. .

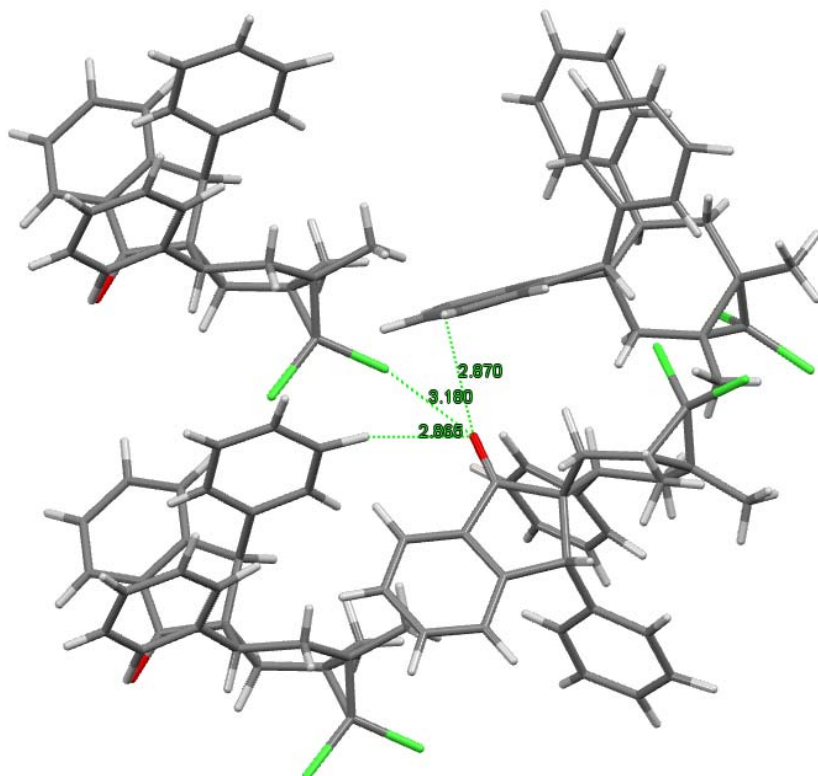

**Figure Sup13**

Example of a chloro-ketone compound VIKLIK with high  $E(O,Cl)=2.58$ . The unique oxygen atom forms an  $O\dots Cl$  halogen bond and two  $C-H\dots O$  weak hydrogen bonds. The angle  $C-Cl\dots O$  is  $155.7^\circ$ .

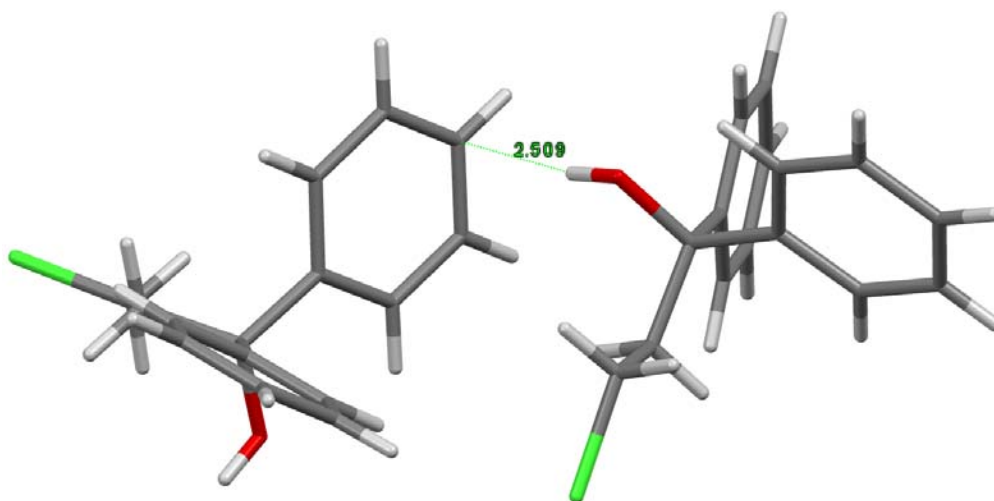

**Figure Sup14.** Example of an outlier among chloro-alcohol compounds with absence of strong hydrogen  $O-H\dots O$  and of  $O-H\dots Cl$  contact. The unique hydroxyl hydrogen atoms forms an  $O-H\dots \pi$  hydrogen bond with a phenyl ring.

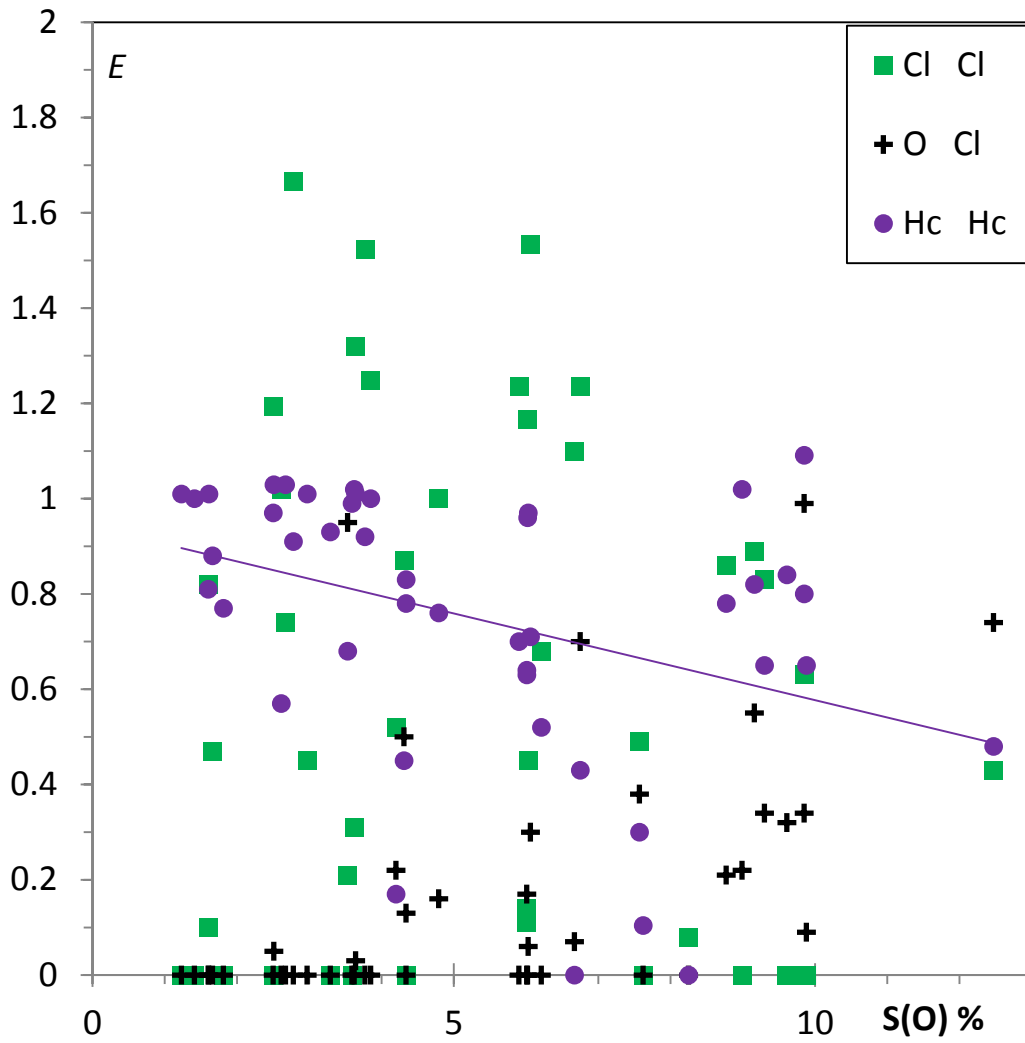

**Figure Sup15**

Enrichment ratios of some contact types in chloro-alcohols.

## Table SUP1

List of oxygenated hydrocarbon compounds retrieved from the Cambridge Structural Database for each family of analyzed molecules.

### LIST of ketones

ADETAE ANDION11 ATCDEO BEHZIX BEHZOD BNORSO10 BOJVUS BUCHAI  
CASJUB CEDDUK01 CEVVOO CEVXAC CFSOB COQCUG CUFHAM CUJXOU  
CUJXUA CUJYAH CYDECO DANJEH DAZVEF DELZID DELZOJ DIWLOK DIWMEB  
DIWPIL DIWPOO DUSDOL DUWBEC EBAVAE EJEFOO FONCOB FURGII10  
FURGOO10 GEBRAG GETNUO GILZUW HABZAL HEBBEV HEJGUY HIXHIF05  
HMTCDO INUHII JAPBIL JAPBOR JAPDAF JIBFOP JOPLOP JULJUV KEPBAJ  
KETTUY01 KETVAG10 KIKYOS KIMBOX KOQHON LAVDAN LAVHIZ LAVHOF  
LAVHUL LIHMIA LIHMOG LIXMOV LIZNOY LIZNUE LULHIJ MABEST MDHPNO  
MICRAT03 MICRAT04 MUSMUI NAFBOL NCUBEB10 NOYWAZ OFOQIL OMCHDO  
OXCHHX PADCAY PCDODO PROPTO PUKJUA PUSDEM QEYFAB QIFHESQOYTAZ  
QULNIV QULYOL RASWEN RIJGAS ROCMAY SAZVAQ SEJFOC SEJPOM SIHXUE  
SIHYAL SILMIJ TABNON TBUCHO TCDODO TCPDON TCTDTP02 TETMOU TETNIP  
TETNIP01 TMCYNO TOHZUL UNDECO UYUGAX VAMKEZ01 VARCUM VAXRES  
VOQRAU WIHJAZ XEQWOG XONXON YABCOT ZAKNUU ZZZMZM01 ZZZQAI02  
ZZZWGK01

### LIST of aliphatic ethers

CANNIO CEZSEF CMPANL01 CUKCIU01 DCHXCR01 DCHXCS01 DCHXCS02  
DCHXCT DCHXCT01 FOBHIN GASLUI GEFJIK GEFJOQ HAZKAV HOXOCD02  
LAKDEH MECZID MOFPAY NABREN NAKWUR OBIBOQ PUTHOB QEGSOL  
SEMKOK SIPSAL SISMUC SISNAJ TANMAT TEMCAP TIVHOW TIVJAK TIVJOY  
TIVJUE TOXCDP TOXCTD VEQKEH ZZZWGK03 YAGCEQ ZONRAV ZOSSEF

### **LIST of esters**

ADUQIZ AGAJEX AGAJIB ALUVIM BEDNAZ BEFJUR BEKJIK BOBCIE BOBCIE10  
BOJZUV BOPVIN BOSPUO CBTCME CINGAH CMEOXE01 CORNIH CORZAK  
DADQIK DEVBIP DODCHD DOJFOZ DOJFUF DOJGAM DUFMIA ECOTDA FAFDAS  
FAFDAS01 FAFDAT FATRUN FAWLEU FEJKOV FEMLEO FICYUM FITGEU  
FOLVUX FUMJON GEJLAK GEQQIC GOGXUV GOKMOK HEGSAN01 HEGSAN10  
HEMKOZ HIFWOI HINHUI HINJEV HOSNAE HOYTOF IWUFAH JAXMIF JEDZAT  
JEGYIE JIRXIS JORJEF JORJEF01 JORSIS KAMRAS KAXPOP KEJXII KEJXOO  
KEMFOY KUZVIN LEDNOX LEDPIT LITLIK MAJYAX MAMNAC MCMSCA10  
MESQOR MTCDEC NACCID NETDOG NIFCOU NIFCUA NOSLOW NUQPIZ OMIDOD  
PAPVOR PATCUI PEHWAA PEKKEV PERCEN PESFUL PIJQOO PILLEB PIYYIG  
QETVUG QIKBER QOYKIY SEDLUI SEJWOT SIQQEP SUKXAX SUNHIS SURCEN  
SURCIR TELREH TIHMUS TIHNAZ TIVCOR TORMAP UCOJOM VANLEB VARPEJ  
VEBYEG01 VESDAY VESDAZ VEXRAR VODFOJ VOHNAH VUPVOR WECCAI  
WECCUC01 WELSUD WIRPAO XAGKEW XEGKID XODHAZ YARZUN03 YIXTUV  
ZAMVAK ZILQAM ZORKUM

### **LIST of nitro ether**

ACENUS BAWJIT DADBAM DARGAF EFAXOY FALHUW FEFPEM FESPEY  
IPATOJ JUJSIR JULGAY MEMDIS MUBLUR NILNOL NNAPMP NUBZIU  
QEDYOP RUJBAA RUJSEV SILRUB SINJIJ VALTEJ YAWPAP ZIKYIB

## **LIST of alcohols**

ACAVIJ AFILEI ASOCER ASOCIV ASOCOB ASOTOR BAJNAB BAVLOZ BCHMOL  
BESWON BEVBAF BILMIU BOGKIR BOMKUJ CAVDEI1 CEJXIY CERMOB  
CERMUH COYFEB CUVFII CYOCDL01 DABKOG ECEPEJ EHI XOI FECCOF01  
FEPKUG FERTAY FEXKOI FIFRIV01 FUNCIA GIGYAW GOJKEV GOMQUV  
GOXMAH GUHBIU GURBUQ HANPAN HEBDIB HIYHAY HOCCAD HUKLIJ  
HXCHEX ICAHID IQAFAI JAJSOC JAXLUQ JEDBUQ JEQZUB JONLIH JONLON  
KAPNAQ KEKPEW KEPSON KEZTIU KEZTOA KOFFUH KOPKUV KUKYAR  
KUXFIT LOBQOK LOJXIS LONGAX LUdTUA MAMGEN MATLIC MEGJAJ  
MEGJEN MENVIL MINFEV MURABD MUTYOP NAYZOD NEPGCL01 NEZ FON  
NIWNUC NULZEA NUMTUK PELBIR PERYTO04 PICYAB PILRAE PIMARB PIRBOJ  
PIRLOT PIWXIK PIYXOL PMGLYC POHYEQ POJGUQ POJYIX POMWUK PUFJIJ  
QATTEK QATTOU QATVEM QAZQAJ QIMCUK QURRUQ QUTFOA RAJDIP  
RIHMAX RIQMAG RIWTIB01 RIYZEF ROGNIL RUKNER RUSKEW RUVWAG  
SEVPAL SEVPEP SILGEZ SIQGUU SUPMIA SUPMOG TEZQIA THXCHO10 TIQHAC  
TIXXED UDEMEV VAHXAD VEKMED VIDXIR VIWHAL VIWTAX WEFWAH  
WEJMAA WERTUI WESTET WESTIX01 WOYKOK WUTMAA XEWKER XEYMIX  
XIDQUW XIJPEL YAJYIS YEJNIK YEYLUK ZEPAD ZINWAU ZZZFFY01  
ZZZGSC01 ZZZKPE01 ZZZPSA01

**Alcohols molecules discarded, due to wrong hydroxyl orientation.**

**Detected by high  $E(O,O)$**

BCUNDL CUVFII EHIYEZ GUHBIU GEBSUB NEMXUY QIVYIF  
RIQMAG SETJIK SOTBEI TEZQIA UDEMEV VIDXIR

**Detected by low  $E(O,HO)$**

EPFRED02 SETJIK EHIYEZ NEMXUY SOTBEI QIVYIF

## **LIST of phenols**

ABUCOP AXEKOD BECNII BECPAC BEZRIJ BIRKOC01 CARJIQ CARKOX  
CATCOL12 CEYKUM CONNID CUFVII CUPDUM DENSOL01 DOGWOL DOGWUR  
DOHDPH02 EJEVOE ESTILO03 FEVCAL FIPYAG GALCAY HEGFAB HESKOF  
HESKOF01 HYQUIN08 ILABAZ JABWAK KAPVIH LERFET01 LESVEL MEBMIP  
NAPHOL01 NIYQUH NIYRAO NPHLDL01 NUTSUQ OTASUY PHGLOL01  
PIDZIM PYRGAL02 PYRGAL03 RAGLEQ RASCEU RAWDOI RESORA03  
RESORA13 SAGSOJ SIJHOJ SOPXUQ SUZXAN UCOFIC UDEMAR UKILAC  
UKILAC01 VOGRUE WAJJOG01 WANNII WETFAD01 WIKFIF WIZNAV XAXSIY  
YOTXUB ZZZGWU01

### **Phenol molecules (retained) with $E(O, Ho)=0$**

ACAYIN AKUSEE AKUSII BERKEQ BIPXEF DPPHOL01 EFEMOT FECYUI GANVAS  
JABVUD KANJUF KAZHAU LIDJAK MBPHOL01 TUJYAZ XILZEX XMBPPR

### **Phenol molecules discarded, due to wrong hydroxyl orientation.**

KAZHAU

## **LIST of alcohols-phenols**

EHAVAL ENOJOH ENOKAU EWUGUY FEGFAZ GAYKEW GOLMOL IQESEC  
IQESIG IQESOM JAGQOX KEKTIE KOHJOG NURXED SAWHON SIPROY  
TITHOU UPAHUP XIJFEB XURHUO XUYRUF

### **Alcohol-phenol molecule discarded**

MERHIB



### **LIST of hydroxyl-carbonyls**

ATEPOE BALGAW BASYID BERJIR BEXGEQ BOBVIZ BOKVUS BOVMUU  
CUCHOX DAWQUO DESVIG DHPRTO02 DICREM DIYMOO DUNHOK DUZPUJ  
DXTMPO EADSUX EFEPOW EGUCOA EHALUU EHNPRG EJABUN ELOPUQ  
EYNAPO10 FAFSOV FAGYER01 FAVBAH FICPOY FITYUC FIZLIK FUXMOA01  
GELQOD GERRAX GIVROT GODWAZ HIHTIB HIRROQ HMEPRG HMMAZO  
HMNPRG HNOBCH HONSUY HPRGDO HTCDDO HXPRED ICUQAZI CUQAZ01  
IQOCUM IVOFUU JAZCIX JIWPEL JIWPEL01 JOHMOK KEFCED KIFGIP KUCDER  
KUMZEX LAVJAT LESNEE LIQCEU LIXFIH LIXFON LIXFUT LOBPID LOCJOD  
LOFZIQ LOSKAG MERBUH MILVUZ MILWAG MIMREG MTHPRG NAMMU  
KNETIN DNETIND01 NETIND02 NORGES01 NORGES10 NUBYUF OHMEDC10  
OHUNEL PAGLEO PEZFEG01 PIHHAR POKQOX POSJAI PRGDOL02 PUVLOI  
QAQVUA QEQMII QEXLUB QINFOI QUYTUA RIHJEY RIMQUB RONTET SEBNUJ  
SEHCAK SIYWON TANBEP TEGWAD TETNUB TETPAJ TETPEN TIFNIG TIFNUS  
TIMVAM TOLNEO TOLNIS TONWIE UKUBAD ULEMEE UQOHOY URAJON  
UZEVEB VABQAS VEXKEO VIDVIP VIHCAR VIHCEV VOHTAP WAMVIQ  
WAVWOF WAVXIA WAVYAT WEFWEL WELXIU WEQMAG WOBKAZ YEGZOZ  
YOFWOG ZUDQAQ

### **LIST of hydroxyl-carbonyls dimers**

BARYAU EGUCUG EJAYEU EYHENO EZOQUF GAHJEE KESKAV MACKAD1  
NOLFIF RAKZOT RHODON SOFJEC VAPROU XETXIF XMPRYO YABCEJ  
ZZZPNG01

### **LIST of alcohols-monohydrate**

BABYUA COQCOA ENIVON ESEDMH EVARUP FOZWEX GATVED GIXFID  
GIYJAA HXVITD IRIDE JAPZAB MYTOLD01 NAYKUT PECXIE TAGSAV01  
TILZUL TIVBOP XAXKEO

Structure discarded : UBUGON

### **LIST of alcohols-ketones-monohydrate**

ACOWAQ BEBFOD BOQSUV CAMTUG EGOTOL GOFUCB ITEJEW JIFYEC  
KEFCIH LIBWUQ NIFFEN NUSPEX PIRBUP SEZBAB TOVTED UQABIY  
VIDVAH VOQWEE WINLIP XABMAQ XEPGAC YAFQIG YAHQED

Structures discarded: ITEJEW YAHQED

### **LIST of chloro-ethers**

AXAGUC AZOPEL BONDEP EDIZEW FAMFOO FUDBAI FUYJUF HEWJIE HUGBAN  
IDEFIG JEHJOV LINPIH LOCBEM MERQIK MERQOQ MERQUW MERRAD MERREH  
MILPUT MONGAY MUWROM NAVGAU ODOTUW ODOVEI OSOKEN PODJIC  
PUYSIL REBKOY TITQAO UDANAP VAFBEJ WINRUG YAWLIT

### **LIST of chloro-ketones**

ABEFOD ACOQIU AGAQUW AGOLEN AXAREX AZIBER BAGZIS BAMYUJ  
BEMMEL BIMVAV BIMVEZ BOKJIW BZQDCL10 BZQDCL11 CBCYHO CEKZEX  
CIGGUU CIQFAK CLBENQ CLMANO CLPMCY01 CLTCOT CODHAE CORCUH  
CORDAO COXBST CPCPRO10 DALKIM DASMIU DASNOA DCLBQN DCLBQN01  
DCLBQN03 DCLBZQ20 DIKYUR DISWEJ DISZIO DITYAG DITYAG10 DIYYUG  
DOXQIQ DUJPUU DUVFOP20 DUXTUL DUZSIA DUZSUM DUZTAT DUZTIB  
EBEQOR ECECUL EFUFER EKUYUF ELEWEX EROFAT EVIKAW EXODAW  
EXODIE EXODOK EYISIO FABGUK FABRAB10 FABRAB11 FAKKAD FAKKEH  
FAKKOR FOMSAB FUWNAM GATRAU GAVBEL GICMUA GIHGAG GIKNUJ  
HACJOK HENBEH HILFUF HIZGOO HOQTAJ HUDHAQ HUFZAK HUGQOQ IBEP  
IDIRIY IFINES IFORIG IJOWUA INEHAK IPUVOF JEQVUX01 JIZQEQ JIZQEQ01  
JORGEC JORGIG KAFXIY KAVDOA KAVDUG KIDBUU KOSKIM KUMKUY  
KUMKUY10 KUNRAM LAPGIS LAPHAL LAPROL LEBGUU LEGXOM LEJDAH  
LEJDEL LEJDIP LEJDOV LEJYUU LUGMUW MATDUG MEGHUD MEHGAI MIGXAC  
MIYCED MIYLAH MODSUU MUCONC10 MUDBUJ MUDREJ MUQZED NAFDAY  
NAFQEQ NORBAY OGOROR OHIBOW02 OKEPUP OMIVAH OMIZUF PABZAT  
PAMPEY PAQJUO PEJHOD PEJHOD01 PEJJOF PEJJOF01 PEJKAS PEKDUF  
PIQLOQ PIQSEN PIRDEB PIWRES POJWUG POJXAN PONPEO PUKJEL PUQSOJ  
PUYWUB QAVGID QEYAN QEWXIA QEWXIA01 QIQBEZ QOWNAR RISHOR  
ROFVIS ROGPEK ROMVEV RUFGOP RUPSIE SENZAO SIMTUE SUQDAJ  
SUQFAL SUQFIT SUQGEQ TAJBUB TAWLAE TCOXHN TIFZOX TIGSAE  
TIMNUA TIVBEG TOMZIG TURBAK UBIKEV UCOXUG UNUVAB UREKEI  
UVEKOW VEDXEH VIDHOF VIKLIK VUKVEC WAHNOI WAKWOW WEDMOH  
WIRCUV WOBBUL WOJGOS XEGLEA XEZHEP XEZNEX XUGVOK XUGYAZ  
XUGZEE YAKHOH YIFDUN YIVGIU YUDGAG ZEPVOH ZOBVAN

### **LIST of chloro-alcohols**

AKEKEH ANALEH CUGPEA CUGPIE DADZAK DADZIS DAWMOE EJIWOJ  
EXOPEM GAKNAH HHCLMI HOYCOO HOYCUU ICUREE ICUROO ICUSAB ICUSOP  
IDOGEN IDURII IKUYUJ KIRBAQ LAKFOS LEPUY LESPOQ MUDZUH NESVAJ  
NETBAQ OCENOA OCENUG QEVRIQ QEWYUN RAJFIT SIFXEL TEFSAA TIMROW  
TIMRUC UFEQON ULEPOR VIWNAS WECPEB WECPIF WEGGOF WEGHAS WIXYEI  
XEHKIE XEHLEB01 XULSOM

## Table Sup 2.

Statistics on  $E$  and  $E'$  values for all families of compounds.

Definition used here for "Mean value  $E'$ " :  $\langle E \rangle = \langle E' \rangle$  if  $\langle E' \rangle$  is smaller than 1.

$\langle E \rangle = 2 - 1 / \langle E' \rangle$  if  $\langle E' \rangle >$  is larger than 1.

ssd  $E'$  : sample standard deviation

Std err Mean  $E'$  : Standard deviation of Mean  $E'$

No. structures : Number of structures

### Ketones

| Contact           | H...H | O...H | O...O |
|-------------------|-------|-------|-------|
| Mean value $E'$   | 0,97  | 1,14  | 0,02  |
| Mean value $E$    | 0,97  | 1,16  | 0,02  |
| ssd $E'$          | 0,04  | 0,08  | 0,07  |
| Std err Mean $E'$ | 0,004 | 0,01  | 0,01  |
| Std err Mean $E$  | 0,004 | 0,01  | 0,01  |
| No. structures    | 119   |       |       |

### Ethers

| Contact           | H...H | C...H | O...H |
|-------------------|-------|-------|-------|
| Mean value $E'$   | 0,97  | 1,04  | 1,12  |
| Mean value $E$    | 0,97  | 1,05  | 1,14  |
| ssd $E'$          | 0,04  | 0,08  | 0,09  |
| Std err Mean $E'$ | 0,01  | 0,01  | 0,01  |
| Std err Mean $E$  | 0,01  | 0,01  | 0,01  |
| No. structures    | 39    |       |       |

### Nitro-Ethers

| Contact           | H...H | H...Occ | H...On |
|-------------------|-------|---------|--------|
| Mean value $E'$   | 0,84  | 1,03    | 1,31   |
| Mean value $E$    | 0,86  | 1,03    | 1,45   |
| Ssd $E'$          | 0,23  | 0,49    | 0,11   |
| Std err Mean $E'$ | 0,05  | 0,10    | 0,02   |
| Std err Mean $E$  | 0,05  | 0,10    | 0,02   |
| No. structures    | 24    |         |        |

## Esters

| Contact         | H...H | H...Occ | H...O=c |
|-----------------|-------|---------|---------|
| Mean value E'   | 0,92  | 1,07    | 1,19    |
| Mean value E    | 0,93  | 1,07    | 1,23    |
| ssd E'          | 0,07  | 0,12    | 0,10    |
| Std err Mean E' | 0,01  | 0,01    | 0,01    |
| No. structures  | 123   |         |         |

## Alcohols

| Contact         | O...Ho | O...O | C...O | Hc...Ho | O...Hc | Hc...Hc | C...Hc |
|-----------------|--------|-------|-------|---------|--------|---------|--------|
| Mean value E'   | 1,80   | 0,10  | 0,25  | 0,54    | 0,56   | 1,09    | 1,11   |
| Mean value E    | 5,08   | 0,10  | 0,25  | 0,54    | 0,56   | 1,10    | 1,13   |
| ssd E'          | 0,11   | 0,37  | 0,30  | 0,16    | 0,16   | 0,06    | 0,14   |
| Std err Mean E' | 0,01   | 0,03  | 0,03  | 0,01    | 0,01   | 0,00    | 0,01   |
| No. structures  | 144    |       |       |         |        |         |        |

## Phenols

| Contact         | Hc...Ho | O...Hc | Hc...Hc | C...O | C...Hc | O...Ho | O...O |
|-----------------|---------|--------|---------|-------|--------|--------|-------|
| Mean value E'   | 0,60    | 0,88   | 0,92    | 0,37  | 1,14   | 1,41   | 0,17  |
| Mean value E    | 0,60    | 0,88   | 0,92    | 0,37  | 1,17   | 1,69   | 0,17  |
| ssd E'          | 0,29    | 0,28   | 0,22    | 0,34  | 0,16   | 0,76   | 0,56  |
| Std err Mean E' | 0,03    | 0,03   | 0,02    | 0,04  | 0,02   | 0,08   | 0,06  |
| No. structures  | 81      |        |         |       |        |        |       |

## Alcohol-Phenol

| Contact         | C...Ha | C...Hp | C...C | Hc...Ha | Hc...Hp | Hc...Oa | Hc...Op |
|-----------------|--------|--------|-------|---------|---------|---------|---------|
| Mean value E'   | 0,81   | 0,22   | 0,69  | 0,64    | 0,69    | 0,61    | 0,94    |
| Mean value E    | 0,81   | 0,22   | 0,69  | 0,64    | 0,69    | 0,61    | 0,94    |
| ssd E'          | 0,61   | 0,32   | 0,33  | 0,32    | 0,30    | 0,28    | 0,25    |
| Std err Mean E' | 0,14   | 0,07   | 0,07  | 0,07    | 0,07    | 0,06    | 0,06    |
| No. structures  | 20     |        |       |         |         |         |         |

  

| Contact         | C...Hc | Hc...Hc | Hp...Oa | Hp...Op | Ha...Oa | Ha...Op |
|-----------------|--------|---------|---------|---------|---------|---------|
| Mean value E'   | 1,15   | 1,00    | 1,63    | 0,18    | 0,90    | 1,20    |
| Mean value E    | 1,18   | 1,00    | 2,69    | 0,18    | 0,90    | 1,25    |
| ssd E'          | 0,10   | 0,08    | 0,70    | 0,54    | 0,78    | 0,91    |
| Std err Mean E' | 0,02   | 0,02    | 0,16    | 0,12    | 0,17    | 0,20    |

## Alcohol-ketone

| Contact         | Hc...Ha | Hc...Hc | Hc...Oa | Hc...O=c | C...Hc | Ha...Oa | Ha...O=c | C...Ha |
|-----------------|---------|---------|---------|----------|--------|---------|----------|--------|
| Mean value E'   | 0,65    | 0,99    | 1,08    | 0,96     | 1,06   | 0,43    | 1,55     | 0,50   |
| Mean value E    | 0,65    | 0,99    | 1,08    | 0,96     | 1,07   | 0,43    | 2,22     | 0,50   |
| ssd E'          | 0,23    | 0,06    | 0,24    | 0,22     | 0,11   | 0,73    | 0,64     | 0,44   |
| Std err Mean E' | 0,02    | 0,01    | 0,02    | 0,02     | 0,01   | 0,06    | 0,06     | 0,04   |
| No. structures  | 133     |         |         |          |        |         |          |        |

## Alcohol monohydrate

| contact         | Oa...Ha | Ow...Ha | Oa...Hw | Ow...Hw | Oa...Hc | Ow...Hc |
|-----------------|---------|---------|---------|---------|---------|---------|
| Mean value E'   | 1,32    | 1,80    | 1,75    | 0,40    | 0,46    | 0,61    |
| Mean value E    | 1,47    | 5,12    | 3,99    | 0,40    | 0,46    | 0,61    |
| ssd E'          | 0,70    | 0,12    | 0,17    | 0,66    | 0,25    | 0,28    |
| Std err Mean E' | 0,16    | 0,03    | 0,04    | 0,15    | 0,06    | 0,07    |
| No. structures  | 19      |         |         |         |         |         |

  

| contact         | Hc...C | Hc...Hc | Hw...Ha | Hc...Ha | Hw...Hw | Hw...Hc | Ha...Ha |
|-----------------|--------|---------|---------|---------|---------|---------|---------|
| Mean value E'   | 1,14   | 1,15    | 1,04    | 0,42    | 0,48    | 0,69    | 0,78    |
| Mean value E    | 1,16   | 1,17    | 1,04    | 0,42    | 0,48    | 0,69    | 0,78    |
| ssd E'          | 0,26   | 0,14    | 0,50    | 0,21    | 0,51    | 0,16    | 0,52    |
| Std err Mean E' | 0,06   | 0,03    | 0,11    | 0,05    | 0,12    | 0,04    | 0,12    |

## Alcohol-ketone monohydrate

| Contact         | Ha...Oa | Hw...Oa | Ha...Ow | Hw...Ow | Ha...O=c | Hw...O=c |
|-----------------|---------|---------|---------|---------|----------|----------|
| Mean value E'   | 0,59    | 1,48    | 1,86    | 0,13    | 0,53     | 1,46     |
| Mean value E    | 0,71    | 1,93    | 7,01    | 0,53    | 0,68     | 1,84     |
| ssd E'          | 0,81    | 0,62    | 0,05    | 0,39    | 0,81     | 0,60     |
| Std err Mean E' | 0,17    | 0,13    | 0,01    | 0,08    | 0,17     | 0,13     |
| No. structures  | 22      |         |         |         |          |          |

  

| Contact         | Hc...O=c | Hc...Oa | Hc...Ow |
|-----------------|----------|---------|---------|
| Mean value E'   | 0,94     | 0,81    | 0,82    |
| Mean value E    | 0,95     | 0,84    | 0,85    |
| ssd E'          | 0,23     | 0,37    | 0,27    |
| Std err Mean E' | 0,05     | 0,08    | 0,06    |

## Chloro-ether

| Contact         | Cl...Cl | Cl...Hc | Hc...Hc | C...Cl | C...Hc | C...C | O...Cl | O...Hc |
|-----------------|---------|---------|---------|--------|--------|-------|--------|--------|
| Mean value E'   | 0,55    | 1,17    | 0,84    | 0,95   | 1,00   | 0,77  | 0,40   | 1,24   |
| Mean value E    | 0,69    | 1,20    | 0,86    | 0,95   | 1,00   | 0,81  | 0,62   | 1,32   |
| ssd E'          | 0,44    | 0,10    | 0,10    | 0,35   | 0,25   | 0,44  | 0,46   | 0,27   |
| Std err Mean E' | 0,08    | 0,02    | 0,02    | 0,06   | 0,04   | 0,08  | 0,08   | 0,05   |
| No. structures  | 33      |         |         |        |        |       |        |        |
| Contact         | O...C   | O...O   |         |        |        |       |        |        |
| Mean value E'   | 0,35    | 0,11    |         |        |        |       |        |        |
| Mean value E    | 0,61    | 0,53    |         |        |        |       |        |        |
| ssd E'          | 0,43    | 0,35    |         |        |        |       |        |        |
| Std err Mean E' | 0,08    | 0,06    |         |        |        |       |        |        |

## Chloro ketones

| Contact         | Cl...Cl | Cl...H | H...H | C...Cl | C...H | C...C | O...Cl | O...H |
|-----------------|---------|--------|-------|--------|-------|-------|--------|-------|
| Mean value E'   | 0,64    | 1,16   | 0,78  | 0,87   | 0,89  | 0,99  | 0,44   | 1,36  |
| Mean value E    | 0,74    | 1,19   | 0,82  | 0,88   | 0,90  | 0,99  | 0,64   | 1,55  |
| ssd E'          | 0,51    | 0,20   | 0,23  | 0,34   | 0,27  | 0,44  | 0,45   | 0,16  |
| Std err Mean E' | 0,04    | 0,01   | 0,02  | 0,02   | 0,02  | 0,03  | 0,03   | 0,01  |
| No. structures  | 203     |        |       |        |       |       |        |       |
| Contact         | O...C   | O...O  |       |        |       |       |        |       |
| Mean value E'   | 0,63    | 0,06   |       |        |       |       |        |       |
| Mean value E    | 0,73    | 0,52   |       |        |       |       |        |       |
| ssd E'          | 0,52    | 0,20   |       |        |       |       |        |       |
| Std err Mean E' | 0,04    | 0,01   |       |        |       |       |        |       |

## Chloro-alcohols

| Contact         | Cl...Cl | Cl...Ho | Ho...Ho | C...Cl  | C...Ho | C...C  | O...Cl  | O...C |
|-----------------|---------|---------|---------|---------|--------|--------|---------|-------|
| Mean value E'   | 0,56    | 0,55    | 0,49    | 0,85    | 0,64   | 0,82   | 0,17    | 0,63  |
| Mean value E    | 0,70    | 0,69    | 0,66    | 0,87    | 0,73   | 0,85   | 0,55    | 0,73  |
| ssd E'          | 0,53    | 0,62    | 0,60    | 0,36    | 0,54   | 0,49   | 0,26    | 2,67  |
| Std err Mean E' | 0,08    | 0,09    | 0,09    | 0,05    | 0,08   | 0,07   | 0,04    | 0,40  |
| No. structures  | 45      |         |         |         |        |        |         |       |
| Contact         | O...Ho  | O...O   | Cl...Hc | Hc...Ho | C...Hc | O...Hc | Hc...Hc |       |
| Mean value E'   | 1,48    | 0,06    | 1,18    | 0,60    | 1,07   | 0,90   | 0,75    |       |
| Mean value E    | 1,91    | 0,52    | 1,21    | 0,71    | 1,08   | 0,91   | 0,80    |       |
| ssd E'          | 0,75    | 0,27    | 0,23    | 0,28    | 0,25   | 0,43   | 0,29    |       |
| Std err Mean E' | 0,11    | 0,04    | 0,03    | 0,04    | 0,04   | 0,06   | 0,04    |       |

## Protocol to search molecules in the CSD.

To find molecules in the CSD , the following options were always applied:

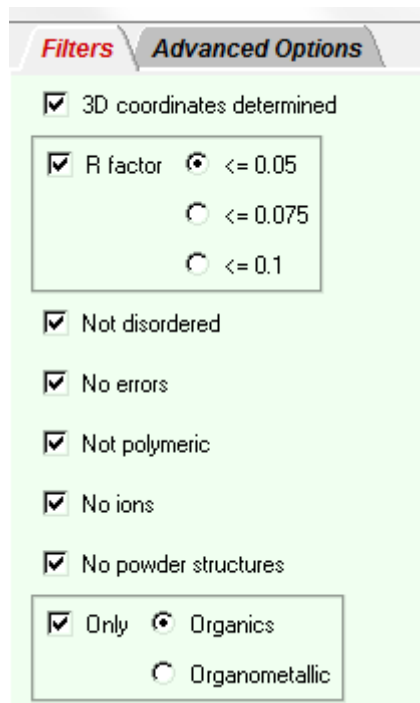

**Filters** **Advanced Options**

- 3D coordinates determined
- R factor
  - $\leq 0.05$
  - $\leq 0.075$
  - $\leq 0.1$
- Not disordered
- No errors
- Not polymeric
- No ions
- No powder structures
- Only
  - Organics
  - Organometallic

To search, for example, the chloro-ether molecules in the CSD with Conquest, the following steps were applied:

- 1) Molecules containing  $\text{C H O Cl}$  were searched
- 2) Molecules containing an ether  $\text{C-O-C}$  group were searched
- 3) Molecules containing a  $\text{O-H}$  group were searched
- 4) Molecules containing a  $\text{C=O}$  group were searched
- 5) A combination of : must have (1) & (2) must not have (3) & (4) was done
- 6) Remaining molecules were inspected on screen and selected if suitable. Molecules with missing hydrogen, errors, with solvent molecules or multimers were discarded.
